# Supplementary material for: CoS2-decorated CdS nanorods for efficient degradation of organic pollutants
Source: Royal Society of Chemistry journal article supplement (doi:10.1039/d2nj03743b), 2022-01-01
Supplement: d2nj03743b1.pdf [file d2nj03743b1.pdf]

## Supplementary Information

### CoS<sub>2</sub>-decorated CdS nanorod for efficient degradation of organic pollutants

Jinyang Liu<sup>a</sup>, Yan Zhou<sup>a</sup>, Xiuniang Tan<sup>a</sup>, Shengjiang Zhang<sup>a</sup>, Chunjiao Mo<sup>a</sup>, Xiaobo Hong<sup>a</sup>, Taolong Wu<sup>a</sup>, Xuecai Tan<sup>\*a</sup>, Yanjuan Liao<sup>\*b</sup>, Zaiyin Huang<sup>\*a</sup>

- a School of Chemistry and Chemical Engineering, Guangxi Minzu University; Key Laboratory of Chemistry and Engineering of Forest Products, State Ethnic Affairs Commission; Guangxi Key Laboratory of Chemistry and Engineering of Forest Products; Guangxi Collaborative Innovation Center for Chemistry and Engineering of Forest Products; Key Laboratory of Guangxi Colleges and Universities for Food Safety and Pharmaceutical Analytical Chemistry. Nanning 530008, China
- b Guangxi Key Laboratory of Polysaccharide Materials and Modification /Key Laboratory of Protection and Utilization of Marine Resources, School of Marine Sciences and Biotechnology, Guangxi Minzu University, Nanning 530008, China

\*Corresponding author: Zaiyin Huang, huangzaiyin@163.com

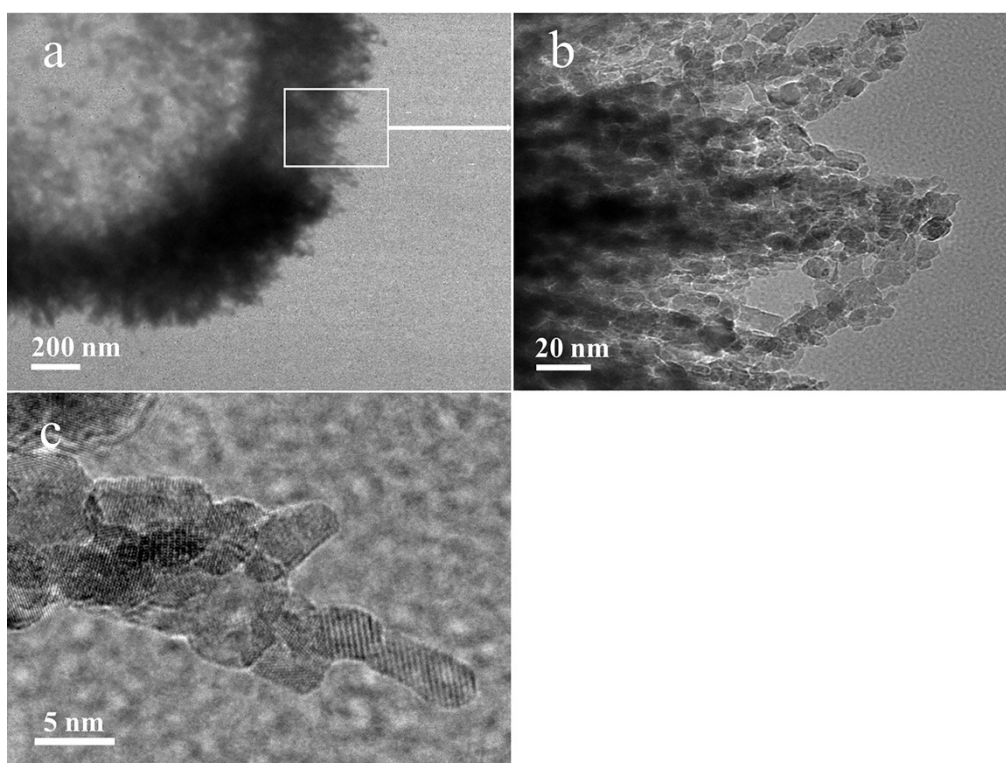

**Fig. S1** TEM images of Co<sub>3</sub>O<sub>4</sub> nanoflakes (a, b, c)

The TEM images (Fig. 1a–b) show that Co<sub>3</sub>O<sub>4</sub> is flake-like with a width of about 10

nm, and the lattice fringes are clearly visible, indicating its good crystallinity.

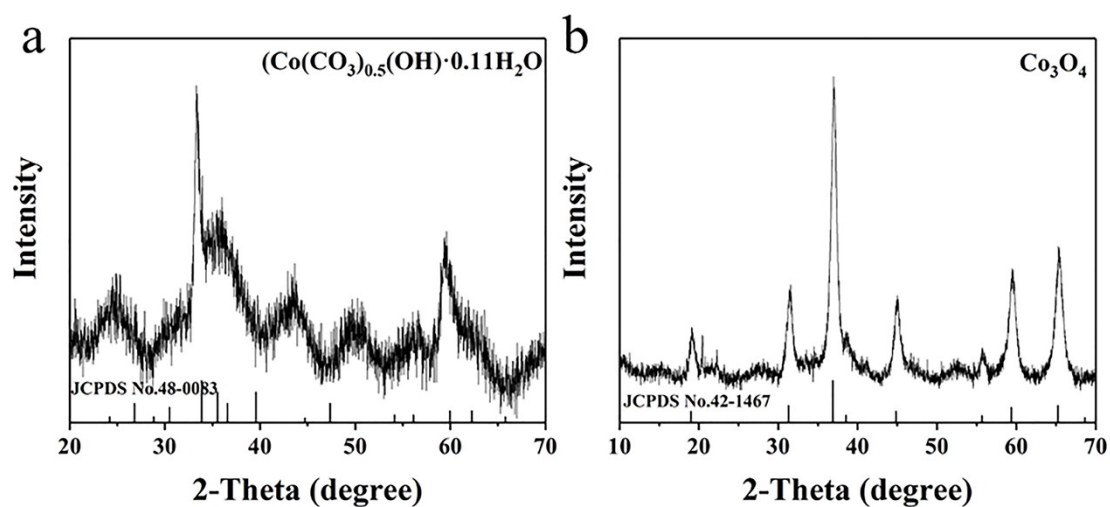

**Fig. S2** XRD patterns of  $(\text{Co}(\text{CO}_3)_{0.5} \cdot 0.11\text{H}_2\text{O})$  and  $\text{Co}_3\text{O}_4$  (a, b).

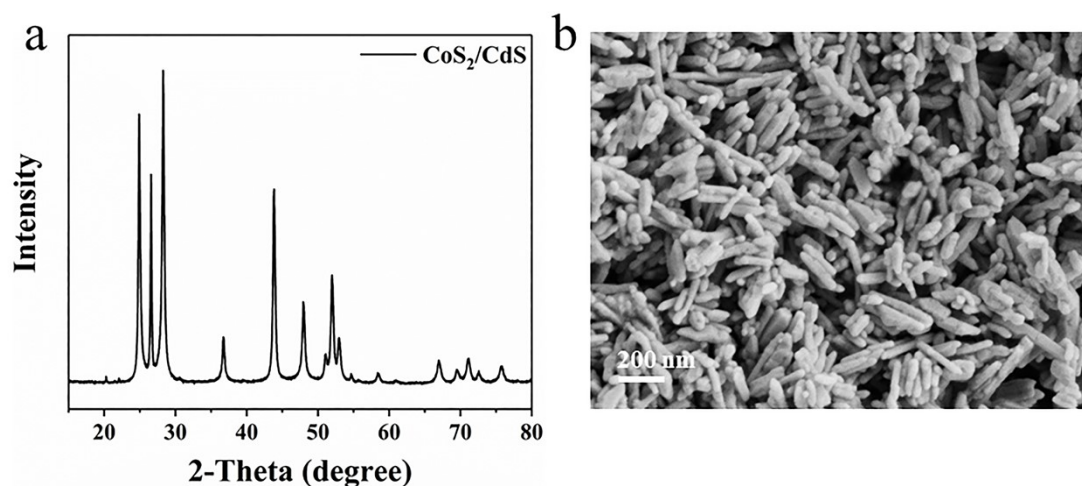

**Fig. S3** XRD pattern and SEM image of the composite catalysts after five catalytic cycles (a, b).

The catalytic effect of the  $\text{CoS}_2/\text{CdS}$  composite photocatalyst remained high after five catalytic cycles. It can be seen from the above XRD spectrum and SEM image in **Fig. S3** that the morphology and structure of the catalyst do not change much after cycling, which indicates the high stability of the  $\text{CoS}_2/\text{CdS}$  composite photocatalyst.

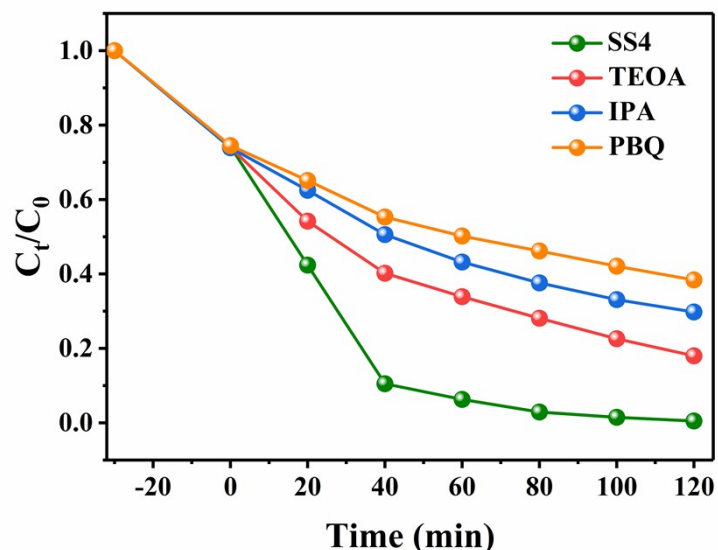

**Fig. S4** capture experiment of SS4 for RhB degradation

The same conditions as in text 2.4, 1mL iso-propyl alcohol (IPA)(1mmol/L), Triethanolamine (TEOA)(1mmol/L), and p-Benzoquinone (PBQ)(1mmol/L) were added into the dispersed solutions respectively to research the photocatalytic active substances. The RhB solutions after reaction were detected by UV-Vis spectrophotometry. Compared with the degradation rates before and after addition of capture agent, we can know the main active species of photocatalyst for degradation of RhB. Simultaneously, as presented in Fig. S4, the capture experiment result indicates that  $\cdot\text{OH}$  and  $\cdot\text{O}_2^-$  act as main active substances in the experiment. This result is consistent with that in the main text Fig 7 analytical concordance.

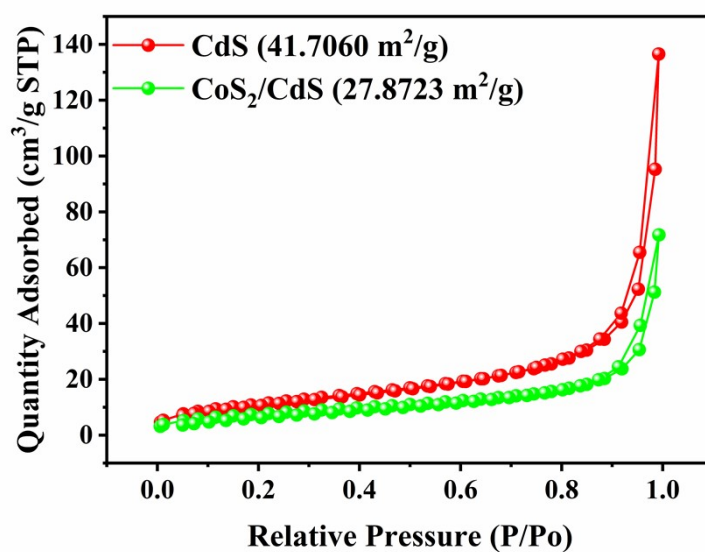

**Fig. S5** nitrogen adsorption-desorption isotherms of CdS and CoS<sub>2</sub>/CdS (SS4).

The N<sub>2</sub> adsorption-desorption isotherms exhibit a type IV mode with an adsorption-desorption hysteresis loop, which is of type H3 (based on the International Union of Pure and Applied Chemistry (IUPAC) classification). The specific surface areas (BET) of CdS and CoS<sub>2</sub>/CdS are 41.7060 and 27.8723 m<sup>2</sup>/g, respectively.

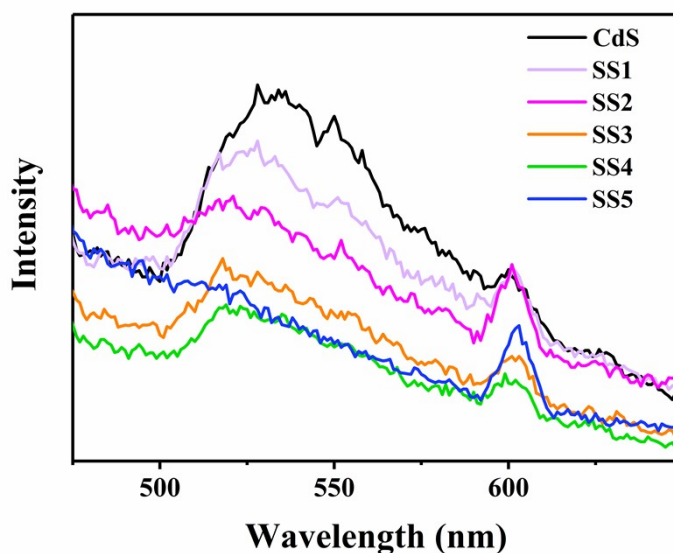

**Fig. S6** photoluminescence spectra of CdS and composites under visible light. ( $\lambda=420$  nm)

We measured the PL spectra of CdS and its composites under visible light excitation, and the conclusions obtained were consistent with those measured under CdS excitation light.

Notes and references

1 S. Zhang, X. Tan, Y. Zhou, J Liu, X. Liang, et al. Phys Chem Chem Phys: 2022, 24, 6193-6207.
